# Supplementary material
Source: Springer Nature journal article supplement (https://www.springermedizin.de/resource/supplementary/13075_2013_4129_MOESM2_ESM.pdf/9696118)
Supplement: MOESM2 [file 9696118]

## Additional file 2 - Distribution of choices across the choice sets

|             | <b>Treatment A</b> | <b>Treatment B</b> | <b>No treatment</b> | <b>Missing</b> |
|-------------|--------------------|--------------------|---------------------|----------------|
| Question 1  | 108                | 126                | 19                  | 4              |
| Question 2  | 25                 | 215                | 15                  | 2              |
| Question 3  | 148                | 78                 | 30                  | 1              |
| Question 4  | 179                | 63                 | 14                  | 1              |
| Question 5  | 138                | 90                 | 29                  | 0              |
| Question 6  | 37                 | 194                | 26                  | 0              |
| Question 7  | 147                | 82                 | 26                  | 2              |
| Question 8  | 139                | 88                 | 28                  | 2              |
| Question 9  | 164                | 60                 | 30                  | 3              |
| Question 10 | 186                | 46                 | 23                  | 2              |
| Question 11 | 139                | 83                 | 32                  | 3              |
| Question 12 | 112                | 119                | 23                  | 3              |
| Question 13 | 144                | 60                 | 48                  | 5              |
| Question 14 | 47                 | 177                | 30                  | 3              |
| Question 15 | 125                | 111                | 19                  | 2              |
